# Supplementary material for: Multifunctional Smart ZnSe-Nanostructure-Based Fluorescent Aptasensor for the Detection of Ochratoxin A
Source: Biosensors (Basel). 2022 Oct 8;12(10):844. doi: 10.3390/bios12100844 (PMC9599676; doi:10.3390/bios12100844)
Supplement: Supplementary file 1 [file biosensors-12-00844-s001.zip › biosensors-1928866-supplementary.pdf]

## Supporting Information

### **Multifunctional Smart ZnSe-Nanostructure-Based Fluorescent Aptasensor for the Detection of Ochratoxin A**

Muhammad Azhar Hayat Nawaz<sup>1,2,3</sup>, Muhammad Waseem Fazal<sup>3</sup>, Naeem Akhtar<sup>4</sup>, Mian Hasnain Nawaz<sup>3</sup>, Akhtar Hayat<sup>3\*</sup>, Cong Yu<sup>1,2\*</sup>

<sup>1</sup>State Key Laboratory of Electroanalytical Chemistry, Changchun Institute of Applied Chemistry, Chinese Academy of Sciences, Changchun, 130022, China.

<sup>2</sup>University of Science and Technology of China, Hefei, 230026, China

<sup>3</sup>Interdisciplinary Research Centre in Biomedical Materials (IRCBM), COMSATS University, Islamabad, Lahore Campus, Lahore, 54000, Pakistan

<sup>4</sup> Institute of Chemical Sciences, Bahauddin Zakariya University (BZU), Multan 60800, Pakistan

\*Corresponding authors

E-mail: akhtarhayat@cuilahore.edu.pk, congyu@ciac.ac.cn

## 1. Instruments and Reagents

Zinc Nitrate, Selenium tetrachloride, hydrazine dihydrochloride, ethanol, ethylene glycol, OTA and amino modified OTA aptamer were purchased from Merck KGaA, Darmstadt, Germany. The characteristic sequence of the amino modified OTA aptamer is:

5'-[AmC6] GAT-CGG-GTG-TGG-GTG-GCG-TAA-AGG-GAG-CAT-CGG-ACA. Rhodamine-B fluorescence organic dye was purchased from AVONCHEM (Cheshire UK), while acetonitrile was obtained from BDH chemicals and phosphate buffer saline tablets (PBSpH-7.4) were purchased from bio-world (bioplus research chemicals). For the preparation of solution each buffer tablets were dissolved in 100ml of deionized water which received from ELGA Pure lab® Ultra water deionizer. Rice extract was prepared by dissolving 1gram of fine rice powder to acetonitrile and deionized water in ratio (6/4-v/v). PBS (pH-7.4) was used to prepare all solutions.

Instruments used during this scientific work were Nicolet™ iS50 FTIR Spectrometer (USA) to record FTIR spectra of ZnSe in the range of 400-4000  $\text{cm}^{-1}$ . X-ray diffraction (XRD) was measured by Rigaku, Miniflex-II (Japan) by means of Cu K $\alpha$  (with a scan angle: 5°-80°, at 40 kV, 40 mA, and (2 $\theta$ ). The surface morphological analyses of the synthesized materials were analyzed using scanning electron microscopy (SEM) TESCAN VEGA3 LMU (Czech Republic). Raman and PL spectra was obtained using in Via Raman Microscope by RENISHAW (UK) with excitation laser of 514nm (laser power: 100%, grating: 1800 I/mm) and laser exposure time of 10s. Ultrasonication has been done by placing of 1.5 ml Eppendorf keeping the temperature below 40 °C in Elma-sonic Ultrasonicator. ZetasizerNanoZS, Malvern Instruments, (USA) was used to measure zeta potentials of the synthesized nanostructures. BET surface area was found using Quantachrome, AutosorbiQ-C-MP surface analyzer (Anton Paar Quanta Tec Inc. USA). Fluoroskan Ascent version FL 2.6 from M/S Thermo Life Sciences, (CergyPontoise, France) was used for fluorescence measurements of ZnSe nanostructures.

**Table S1.** The crystalline size of nanoparticles calculated by using Scherrer and strain by applying Williamson-Hall plot

| Sample | Parameter |        | Peak position | FWHM   | Crystalline size (nm) | Scherrer Average Size(nm) | X-axis   | Y-axis  | slope     |         | William Hall |        |
|--------|-----------|--------|---------------|--------|-----------------------|---------------------------|----------|---------|-----------|---------|--------------|--------|
|        | K         | Lambda | 2( °)         |        |                       |                           | 4Sin( °) | Cos( °) | Intercept | m       | Microstrain  | D (nm) |
| A6     | 0.9       | 0.154  | 31.862        | 0.5104 | 16.1777               | 16.692                    | 1.0979   | 0.008   | 0.0068    | 0.0011  | 1.1          | 20.38  |
|        |           |        | 65.274        | 4.2E-1 | 22.4182               |                           | 2.1572   | 0.006   |           |         |              |        |
|        |           |        | 72.616        | 0.858  | 11.4803               |                           | 2.3685   | 0.012   |           |         |              |        |
| A9     | 0.9       | 0.154  | 31.610        | 0.4045 | 20.4015               | 21.142                    | 1.0894   | 0.006   | 0.0123    | -0.0027 | -2.7         | 11.26  |
|        |           |        | 45.055        | 0.7963 | 10.7953               |                           | 1.5325   | 0.012   |           |         |              |        |
|        |           |        | 65.356        | 0.3040 | 31.0326               |                           | 2.1596   | 0.004   |           |         |              |        |
|        |           |        | 72.898        | 0.4419 | 22.3393               |                           | 2.3764   | 0.006   |           |         |              |        |
| B6     | 0.9       | 0.154  | 31.815        | 0.4912 | 16.8076               | 16.482                    | 1.0963   | 0.008   | 0.0094    | -0.0005 | -0.5         | 14.74  |
|        |           |        | 45.603        | 0.5929 | 14.5293               |                           | 1.5501   | 0.009   |           |         |              |        |
|        |           |        | 64.825        | 0.5394 | 17.4375               |                           | 2.1440   | 0.007   |           |         |              |        |
|        |           |        | 72.080        | 0.5725 | 17.1544               |                           | 2.3534   | 0.008   |           |         |              |        |
| B9     | 0.9       | 0.154  | 36.321        | 0.4998 | 16.7187               | 17.912                    | 1.2467   | 0.008   | 0.0092    | -0.0008 | -0.8         | 15.06  |
|        |           |        | 62.858        | 0.5017 | 18.5502               |                           | 2.0857   | 0.007   |           |         |              |        |
|        |           |        | 72.926        | 0.5347 | 18.4661               |                           | 2.3772   | 0.007   |           |         |              |        |
| C6     | 0.9       | 0.154  | 27.136        | 0.2298 | 35.5491               | 30.06                     | 0.9384   | 0.0039  | 0.0048    | -6E-05  | -0.06        | 28.87  |
|        |           |        | 31.647        | 0.3261 | 25.3104               |                           | 1.0907   | 0.0055  |           |         |              |        |
|        |           |        | 36.150        | 0.3187 | 26.2085               |                           | 1.2410   | 0.0053  |           |         |              |        |
|        |           |        | 45.141        | 0.2632 | 32.6744               |                           | 1.5353   | 0.0042  |           |         |              |        |
|        |           |        | 53.520        | 0.2849 | 31.2071               |                           | 1.8010   | 0.0044  |           |         |              |        |
|        |           |        | 65.815        | 0.3073 | 30.7737               |                           | 2.1731   | 0.0045  |           |         |              |        |
|        |           |        | 72.609        | 0.3434 | 28.6956               |                           | 2.3683   | 0.0048  |           |         |              |        |
| C9     | 0.9       | 0.154  | 45.055        | 0.3525 | 24.3831               | 23.912                    | 1.53253  | 0.0057  | 0.0047    | 0.0007  | 0.7          | 29.48  |
|        |           |        | 36.041        | 0.3753 | 22.2505               |                           | 1.2374   | 0.0062  |           |         |              |        |
|        |           |        | 27.036        | 0.2975 | 27.45                 |                           | 0.9350   | 0.005   |           |         |              |        |
|        |           |        | 31.550        | 0.3397 | 24.292                |                           | 1.0874   | 0.0057  |           |         |              |        |
|        |           |        | 34.196        | 0.3187 | 26.0632               |                           | 1.1760   | 0.0053  |           |         |              |        |
|        |           |        | 53.435        | 0.3800 | 23.3902               |                           | 1.7983   | 0.0059  |           |         |              |        |
|        |           |        | 65.76         | 0.4506 | 20.9838               |                           | 2.1715   | 0.0066  |           |         |              |        |
|        |           |        | 72.541        | 0.4380 | 22.487                |                           | 2.3664   | 0.0062  |           |         |              |        |

Scherer equation

$$d = k.\lambda / \beta.\cos \quad (\text{Equation S1})$$

Scheme 1. d = Crystallite size (nm).

$\beta$  (the peak width of the diffraction peak or full width at the half maximum: FWHM)

$\cos \theta$  ( $\theta$  is the half of diffraction angle).

**Figure S1.** Optimization of Rh-B dye concentration ( $10$ – $250 \text{ ng. L}^{-1}$ ) for the development of ZnSe nanostructures based aptasensor

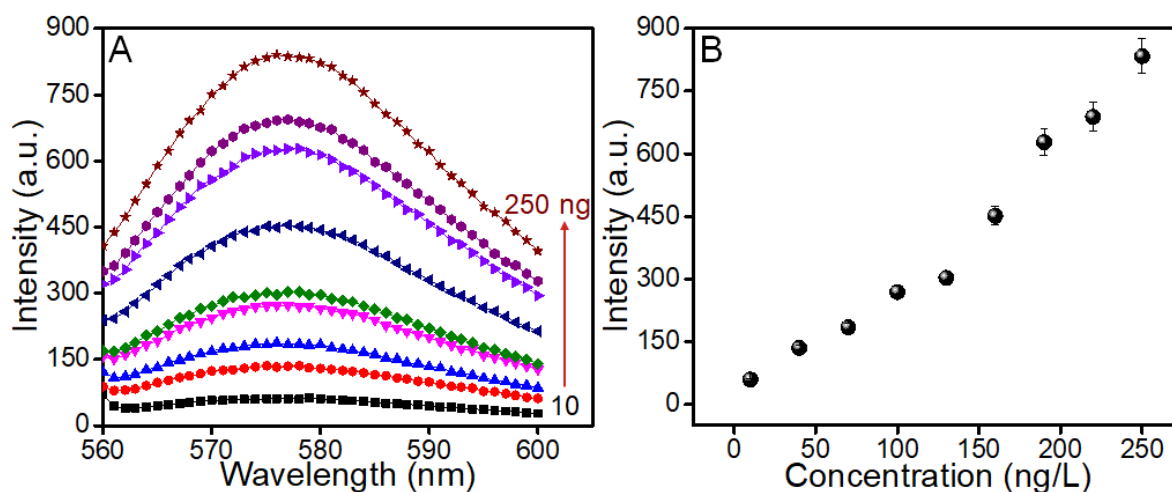

**Table S2.** Comparison of some recent nanostructured based fluorescent sensors for OTA detection.

| Method/Material                                                         | Linear range (ng/L)                    | Detection Limit (ng/L) | Reference |
|-------------------------------------------------------------------------|----------------------------------------|------------------------|-----------|
| NiO nanostructures                                                      | 0.5 – 200                              | 0.49                   | [35]      |
| cerium oxide nanoparticles (nanoceria) and graphene quantum dots (GQDs) | $1 \times 10^1$ – $2 \times 10^4$      | 2.5                    | [39]      |
| PVP-coated gold nanoparticles                                           | $4 \times 10^3$ – $4 \times 10^5$      | $2 \times 10^3$        | [40]      |
| Titanium Dioxide Nanoparticles (TiO <sub>2</sub> )                      | $6 \times 10^2$ – $4 \times 10^5$      | $6 \times 10^2$        | [41]      |
| MoS <sub>2</sub> nanosheets                                             | $1 \times 10^3$ – $1 \times 10^6$      | $1 \times 10^3$        | [42]      |
| Gold and Silica nanoparticles                                           | $4.5 \times 10^1$ – $6.12 \times 10^1$ | $6.05 \times 10^2$     | [43]      |
| Silver nanoparticle (AgNP)                                              | 80 – $5 \times 10^3$                   | 60                     | [44]      |
| Gold nanoparticles (AuNPs)                                              | $1 \times 10^4$ – $1.2 \times 10^5$    | $9.1 \times 10^3$      | [45]      |
| cadmium sulfide semiconductor                                           | $2 \times 10^1$ – $2 \times 10^3$      | 4.8                    | [46]      |

|                        |           |       |           |
|------------------------|-----------|-------|-----------|
| quantum dots (CdS QDs) |           |       |           |
| ZnSe nanostructures    | 0.1 – 200 | 0.072 | This work |

## References (The order numbers of references are consistent with that in the Manuscript)

35. Khan, A.; Nawaz, M.A.H.; Akhtar, N.; Raza, R.; Yu, C.; Andreescu, S.; Hayat, A. Morphology controlled NiO nanostructures as fluorescent quenchers for highly sensitive aptamer-based FRET detection of ochratoxin A. *Appl. Surf. Sci.* **2021**, *566*, 150647.
39. Tian, J.; Wei, W.; Wang, J.; Ji, S.; Chen, G.; Lu, J. Fluorescence resonance energy transfer aptasensor between nanoceria and graphene quantum dots for the determination of ochratoxin A. *Anal. Chim. Acta* **2018**, *1000*, 265–272.
40. Lv L, Jin Y, Kang X, Zhao Y, Cui C, Guo Z. PVP-coated gold nanoparticles for the selective determination of ochratoxin A via quenching fluorescence of the free aptamer. *Food chemistry.* **2018** 30;249:45-50.
41. Sharma A, Hayat A, Mishra RK, Catanante G, Bhand S, Marty JL. Titanium dioxide nanoparticles (TiO<sub>2</sub>) quenching based aptasensing platform: Application to ochratoxin A detection. *Toxins.* **2015** 22;7(9):3771-84.
42. Lu Z, Chen X, Hu W. A fluorescence aptasensor based on semiconductor quantum dots and MoS<sub>2</sub> nanosheets for ochratoxin A detection. *Sensors and Actuators B: Chemical.* **2017** 1;246:61-7.
43. Taghdisi SM, Danesh NM, Beheshti HR, Ramezani M, Abnous K. A novel fluorescent aptasensor based on gold and silica nanoparticles for the ultrasensitive detection of ochratoxin A. *Nanoscale.* **2016**;8(6):3439-46.
44. Jiang H, Li X, Xiong Y, Pei K, Nie L, Xiong Y. Silver nanoparticle-based fluorescence-quenching lateral flow immunoassay for sensitive detection of ochratoxin A in grape juice and wine. *Toxins.* **2017** 28;9(3):83.
45. Lv X, Zhang Y, Liu G, Du L, Wang S. Aptamer-based fluorescent detection of ochratoxin A by quenching of gold nanoparticles. *Rsc Advances.* **2017**;7(27):16290-4.
46. Wei M, Wang C, Xu E, Chen J, Xu X, Wei W, Liu S. A simple and sensitive electrochemiluminescence aptasensor for determination of ochratoxin A based on a nicking endonuclease-powered DNA walking machine. *Food chemistry.* **2019** 1;282:141-6.
